# Supplementary material for: Cellular Antioxidant Effect of an Aronia Extract and Its Polyphenolic Fractions Enriched in Proanthocyanidins, Phenolic Acids, and Anthocyanins
Source: MDPI journal article supplement (doi:10.3390/antiox11081561), 2022-08-12
Supplement: s1 [file s1]

# Cellular Antioxidant Effect of an Aronia Extract and Its Polyphenolic Fractions Enriched in Proanthocyanidins, Phenolic Acids, and Anthocyanins

Cécile Dufour <sup>1</sup>, Jose A. Villa-Rodriguez <sup>2,\*</sup>, Christophe Furger <sup>1</sup>, Jacob Lessard-Lord <sup>3</sup>,  
Camille Gironde <sup>1</sup>, Mylène Rigal <sup>1</sup>, Ashraf Badr <sup>3</sup>, Yves Desjardins <sup>3</sup> and Denis Guyonnet <sup>2</sup>

<sup>1</sup> Anti Oxidant Power AOP/MH2F-LAAS/CNRS, 7 Avenue du Colonel Roche, BP 54200, 31031 Toulouse, France

<sup>2</sup> Business Incubation Group, Symrise Taste, Nutrition & Health, 1E Allée Ermengarde d'Anjou, 35000 Rennes, France

<sup>3</sup> Institute of Nutrition and Functional Foods (INAF), Université Laval, Quebec, QC G1V 0A6, Canada

\* Correspondence: jose.villa.rodriquez@symrise.com; Tel.: +33-02-56-01-64-60

**Table S1.** Polyphenol composition of aronia extract and its fractions determined by UPLC-UV-QToF. Values are expressed in mg/g of extract or fraction  $\pm$  standard deviation.

|                                      | Concentration (mg/g) (Mean $\pm$ Standard Deviation) |                                   |                                     |                                     |
|--------------------------------------|------------------------------------------------------|-----------------------------------|-------------------------------------|-------------------------------------|
|                                      | Aronia Extract                                       | A1 Fraction                       | A2 Fraction                         | A3 Fraction                         |
| Catechin                             | 0.140 $\pm$ 0.004                                    | 0.325 $\pm$ 0.011                 | 0.736 $\pm$ 0.008                   | ND                                  |
| Epicatechin                          | 1.25 $\pm$ 0.04                                      | 2.10 $\pm$ 0.03                   | 4.31 $\pm$ 0.10                     | 0.81 $\pm$ 0.02                     |
| Flavan-3-ols monomers total          | 1.39 $\pm$ 0.04                                      | 2.42 $\pm$ 0.04                   | 5.05 $\pm$ 0.10                     | 0.81 $\pm$ 0.02                     |
| Procyanidin B2                       | 2.213 $\pm$ 0.010                                    | 3.80 $\pm$ 0.02                   | 1.50 $\pm$ 0.04                     | 0.111 $\pm$ 0.010                   |
| Neochlorogenic acid                  | 53.2 $\pm$ 0.2                                       | 108.4 $\pm$ 0.4                   | 0.221 $\pm$ 0.006                   | 0.138 $\pm$ 0.001                   |
| Chlorogenic acid                     | 53.7 $\pm$ 0.2                                       | 111.2 $\pm$ 0.4                   | 0.154 $\pm$ 0.004                   | 0.125 $\pm$ 0.001                   |
| Cryptochlorogenic acid               | 4.624 $\pm$ 0.014                                    | 9.20 $\pm$ 0.05                   | ND                                  | ND                                  |
| Caffeoyl quinide                     | 1.122 $\pm$ 0.013                                    | 2.03 $\pm$ 0.03                   | 0.205 $\pm$ 0.002                   | ND                                  |
| Coumaroyl quinic acid                | 1.582 $\pm$ 0.005                                    | 3.116 $\pm$ 0.015                 | ND                                  | ND                                  |
| Vanilloyl hexose                     | 0.253 $\pm$ 0.008                                    | 0.566 $\pm$ 0.013                 | ND                                  | ND                                  |
| 3,4-dihydroxybenzoic acid            | 0.121 $\pm$ 0.001                                    | 0.299 $\pm$ 0.003                 | ND                                  | ND                                  |
| <b>Phenolic acids total</b>          | <b>114.6 <math>\pm</math> 0.5</b>                    | <b>234.9 <math>\pm</math> 1.0</b> | <b>0.580 <math>\pm</math> 0.011</b> | <b>0.263 <math>\pm</math> 0.002</b> |
| Quercetin-pentoside-hexoside         | 2.579 $\pm$ 0.002                                    | 5.01 $\pm$ 0.03                   | 0.049 $\pm$ 0.001                   | ND                                  |
| Quercetin hexoside deoxyhexoside 1   | 2.390 $\pm$ 0.008                                    | 4.77 $\pm$ 0.02                   | ND                                  | ND                                  |
| Quercetin-3-galactoside              | 3.978 $\pm$ 0.013                                    | 8.08 $\pm$ 0.04                   | 0.049 $\pm$ 0.001                   | ND                                  |
| Quercetin-3-rutinoside (Rutin)       | 2.291 $\pm$ 0.007                                    | 4.56 $\pm$ 0.02                   | ND                                  | ND                                  |
| Quercetin-3-glucoside                | 2.964 $\pm$ 0.009                                    | 5.98 $\pm$ 0.03                   | ND                                  | ND                                  |
| Quercetin-dihexoside 1               | 1.687 $\pm$ 0.004                                    | 3.287 $\pm$ 0.013                 | ND                                  | ND                                  |
| Quercetin-dihexoside 2               | 0.698 $\pm$ 0.002                                    | 1.470 $\pm$ 0.007                 | ND                                  | ND                                  |
| Quercetin                            | 0.693 $\pm$ 0.004                                    | 1.76 $\pm$ 0.04                   | 0.066 $\pm$ 0.001                   | ND                                  |
| Quercetin-hexoside-deoxyhexoside 2   | 0.210 $\pm$ 0.001                                    | 0.407 $\pm$ 0.003                 | ND                                  | ND                                  |
| Quercetin-pentoside                  | 0.194 $\pm$ 0.001                                    | 0.392 $\pm$ 0.002                 | ND                                  | ND                                  |
| Isorhametin-hexoside-deoxyhexoside 1 | 0.254 $\pm$ 0.004                                    | 0.512 $\pm$ 0.007                 | ND                                  | ND                                  |
| Isorhametin-hexoside-deoxyhexoside 2 | 0.233 $\pm$ 0.003                                    | 0.491 $\pm$ 0.002                 | ND                                  | ND                                  |
| <b>Flavonols total</b>               | <b>18.17 <math>\pm</math> 0.05</b>                   | <b>36.7 <math>\pm</math> 0.2</b>  | <b>0.165 <math>\pm</math> 0.002</b> | <b>ND</b>                           |

**Table S2.** Identification of the polyphenolic compounds by UPLC-UV-QToF in aronia extract and its fractions.

| Polyphenol class      | Identification                       | RT (min) | [M-H] <sup>-</sup> | Molecular formula | Error (ppm) | MS2 Fragments (Relative Intensity)                                         | Level * |
|-----------------------|--------------------------------------|----------|--------------------|-------------------|-------------|----------------------------------------------------------------------------|---------|
| Flavan-3-ols and PACs | Catechin                             | 7.39     | 289.0711           | C15H14O6          | -0.35       | 203.0706 (100); 245.0814 (57)                                              | 1       |
|                       | Epicatechin                          | 10.81    | 289.0715           | C15H14O6          | 1.04        | 245.0814 (100)                                                             | 1       |
|                       | Procyanidin B2                       | 9.52     | 577.1348           | C30H26O12         | 0.35        | 289.0717 (100); 407.0768 (87); 425.0872 (30); 245.0814 (23)                | 1       |
| Phenolic acids        | Neochlorogenic acid                  | 5.06     | 353.0873           | C16H18O9          | 0.73        | 191.0555 (100); 135.0447 (89); 179.0332 (57)                               | 1       |
|                       | Chlorogenic acid                     | 8.08     | 353.0871           | C16H18O9          | -0.96       | 191.0561 (100)                                                             | 1       |
|                       | Cryptochlorogenic acid               | 8.90     | 353.0870           | C16H18O9          | -1.80       | 135.0451 (100); 173.0455 (67); 179.0350 (54); 191.0565 (53)                | 1       |
|                       | Caffeoyl quinide                     | 12.95    | 335.0765           | C16H16O8          | -1.38       | 161.0241 (100); 133.0290 (50); 135.0444 (18)                               | 2       |
|                       | Coumaroyl quinic acid                | 7.01     | 337.0918           | C16H18O8          | -1.99       | 163.0403 (100); 119.0502 (82); 191.0561 (16)                               | 2       |
|                       | Vanilloyl hexose                     | 7.67     | 329.0904           | C14H18O9          | -2.1        | 167.0350 (100); 123.0470 (34)                                              | 2       |
|                       | 3,4-dihydroxybenzoic acid            | 3.48     | 153.0184           | C7H6O4            | -2.61       | 109.0280 (100)                                                             | 1       |
| Flavonols             | Quercetin-pentoside-hexoside         | 16.26    | 595.1302           | C26H28O16         | -0.21       | 300.0275 (100); 271.0233 (14); 255.0286 (7)                                | 2       |
|                       | Quercetin hexoside deoxyhexoside 1   | 17.01    | 609.1432           | C27H30O16         | -1.89       | 300.0275 (100); 271.0233 (12); 255.0281 (6)                                | 2       |
|                       | Quercetin-3-galactoside              | 17.27    | 463.0883           | C21H20O12         | -2.53       | 300.0275 (100); 271.0247 (39); 255.0297 (16)                               | 1       |
|                       | Quercetin-3-rutinoside               | 17.51    | 609.1453           | C27H30O16         | -0.98       | 300.0275 (100); 271.0238 (11)                                              | 1       |
|                       | Quercetin-3-glucoside                | 17.80    | 463.0893           | C21H20O12         | -2.24       | 300.0275 (100); 271.0249 (38); 255.0300 (16)                               | 1       |
|                       | Quercetin-dihexoside 1               | 13.88    | 625.1396           | C27H30O17         | -0.01       | 300.0275 (100); 271.0237 (13)                                              | 2       |
|                       | Quercetin-dihexoside 2               | 14.26    | 625.1417           | C27H30O17         | 0.14        | 300.0275 (100); 271.0243 (12)                                              | 2       |
|                       | Quercetin                            | 23.46    | 301.0356           | C15H10O7          | 2.66        | 151.0050 (100)                                                             | 1       |
|                       | Quercetin-hexoside-deoxyhexoside 2   | 19.22    | 609.1449           | C27H30O16         | -1.91       | 315.0477 (100); 314.0428 (37); 299.0205 (37); 271.0213 (24); 285.0393 (13) | 2       |
|                       | Quercetin-pentoside                  | 18.83    | 433.0763           | C20H18O11         | -1.85       | 300.0275 (100); 271.0239 (55); 255.0292 (23)                               | 2       |
|                       | Isorhametin-hexoside-deoxyhexoside 1 | 19.83    | 623.1608           | C28H32O16         | -1.55       | 315.0511 (100); 314.0417 (55)                                              | 2       |
|                       | Isorhametin-hexoside-deoxyhexoside 2 | 20.10    | 623.1615           | C28H32O16         | -0.30       | 315.0486 (100); 314.0384 (33)                                              | 2       |

\* Identification levels were established according to Sumner et al. Level 1 identifications were validated by an authentic standard, while level 2 identifications were proposed according to exact mass, MS/MS fragmentation and UV absorption.

**Table S3.** Composition in flavan-3-ols and PACs after phloroglucinolysis. Values are expressed in g/100 g of extract (mean  $\pm$  standard deviation).

|                             | Concentration (g /100 g) |                   |                   |                   |
|-----------------------------|--------------------------|-------------------|-------------------|-------------------|
|                             | Aronia Extract (AE)      | A1 Fraction       | A2 Fraction       | A3 Fraction       |
| Catechin                    | 0.014 $\pm$ 0.001        | 0.033 $\pm$ 0.001 | 0.074 $\pm$ 0.001 | ND                |
| Epicatechin                 | 0.125 $\pm$ 0.004        | 0.210 $\pm$ 0.003 | 0.431 $\pm$ 0.010 | 0.081 $\pm$ 0.002 |
| Flavan-3-ols monomers total | 0.139 $\pm$ 0.004        | 0.242 $\pm$ 0.004 | 0.505 $\pm$ 0.010 | 0.081 $\pm$ 0.002 |
| Procyanidin B2              | 0.221 $\pm$ 0.001        | 0.380 $\pm$ 0.002 | 0.150 $\pm$ 0.004 | 0.011 $\pm$ 0.001 |
| PACs total                  | 21.95 $\pm$ 0.02         | 1.69 $\pm$ 0.10   | 15.15 $\pm$ 0.04  | 50.32 $\pm$ 0.05  |
| Mean DP                     | 29 $\pm$ 0.6             | 3 $\pm$ 0.6       | 11 $\pm$ 0.7      | 74 $\pm$ 6        |

**Table S4.** Anthocyanin composition of aronia extract and its polyphenolic fractions. Values are expressed in mg/g of extract (mean  $\pm$  standard deviation).

|                           | Concentration (mg /g)            |                               |                                   |                                     |
|---------------------------|----------------------------------|-------------------------------|-----------------------------------|-------------------------------------|
|                           | Aronia Extract (AE)              | A1 Fraction                   | A2 Fraction                       | A3 Fraction                         |
| Cyanidin-3-galactoside    | 31.8 $\pm$ 0.9                   | 64 $\pm$ 3.9                  | 0.89 $\pm$ 0.03                   | 0.33 $\pm$ 0.002                    |
| Cyanidin-3-glucoside      | 2.44 $\pm$ 0.05                  | 5.0 $\pm$ 0.3                 | 0.168 $\pm$ 0.011                 | 0.022 $\pm$ 0.001                   |
| Cyanidin-3-arabinoside    | 13.2 $\pm$ 0.3                   | 28.6 $\pm$ 1.8                | 0.423 $\pm$ 0.006                 | 0.171 $\pm$ 0.003                   |
| Cyanidin-3-xyloside       | 2.21 $\pm$ 0.06                  | 4.9 $\pm$ 0.3                 | 0.081 $\pm$ 0.001                 | 0.029 $\pm$ 0.001                   |
| Peonidin-3-galactoside    | ND                               | ND                            | ND                                | ND                                  |
| Peonidin-3-glucoside      | ND                               | ND                            | ND                                | ND                                  |
| Peonidin-3-arabinoside    | ND                               | ND                            | ND                                | ND                                  |
| Pelagornidin-3-glucoside  | ND                               | ND                            | ND                                | ND                                  |
| Pelagornidin-3-rutinoside | ND                               | ND                            | ND                                | ND                                  |
| <b>Total Anthocyanins</b> | <b>49.7 <math>\pm</math> 1.3</b> | <b>102 <math>\pm</math> 6</b> | <b>1.56 <math>\pm</math> 0.05</b> | <b>0.552 <math>\pm</math> 0.007</b> |
